# Supplementary material for: Discovery of Novel Metalloenzyme Inhibitors Based on Property Characterization: Strategy and Application for HDAC1 Inhibitors
Source: MDPI journal article supplement (doi:10.3390/molecules29051096), 2024-02-29
Supplement: s1 [file s1]

## Supplementary Material

### **Discovery of novel metalloenzyme inhibitors based on property characterization: Strategy and application for HDAC1 inhibitors**

Lu Zhang<sup>1,2</sup>, Yajun Yang<sup>1</sup>, Ying Yang<sup>1</sup> and Zhiyan Xiao<sup>1,3\*</sup>

*1 Beijing Key Laboratory of Active Substance Discovery and Druggability Evaluation, Institute of Materia Medica, Chinese Academy of Medical Sciences and Peking Union Medical College, Beijing 100050, China.*

*2 Department of Toxicology, Tianjin Centers for Disease Control and Prevention, Tianjin, 300011, China.*

*3 State Key Laboratory of Digestive Health, Institute of Materia Medica, Chinese Academy of Medical Sciences and Peking Union Medical College, Beijing 100050, China*

\*Correspondence: xiaoz@imm.ac.cn

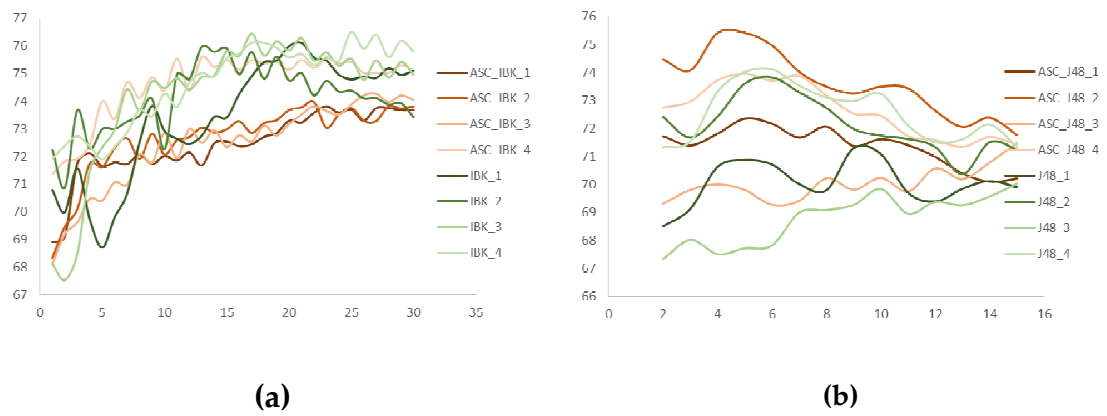

**Figure S1.** Predictive accuracy changing with the K value. **(a)** The curves derived from IBK models; **(b)** The curve derived from J48 models.

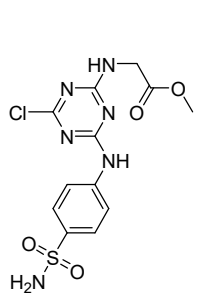

1

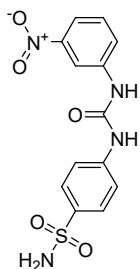

2

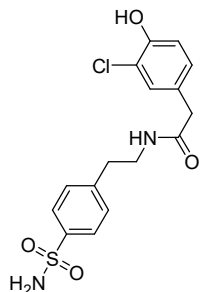

3

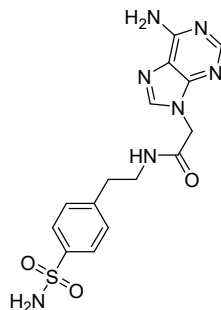

4

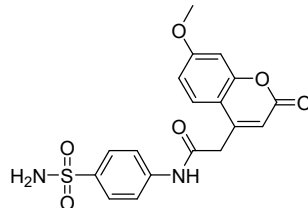

5

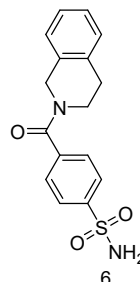

6

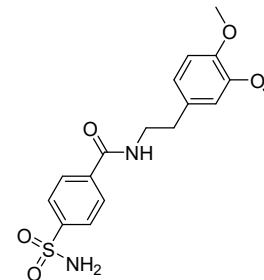

7

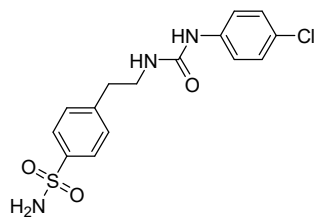

8

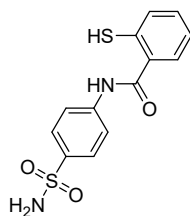

9

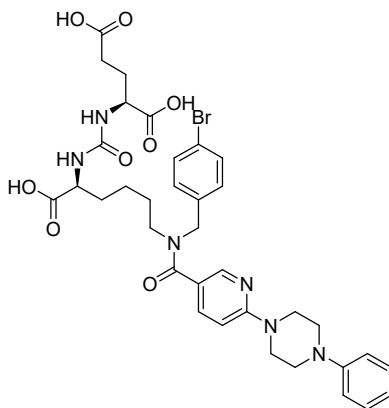

10

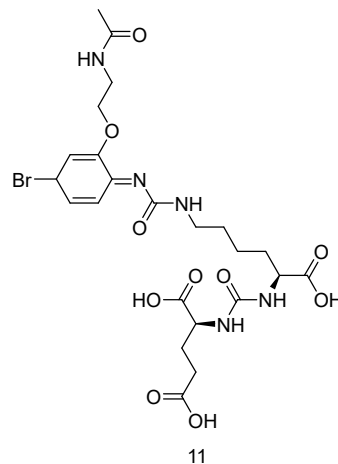

11

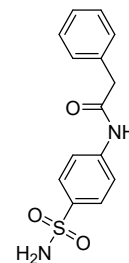

12

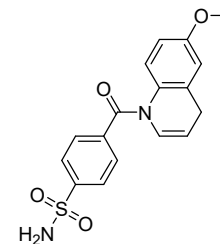

13

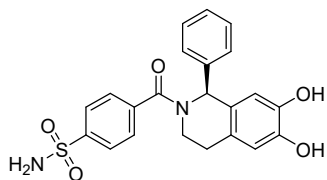

14

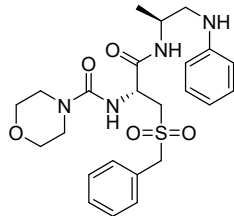

15

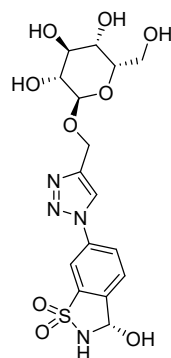

16

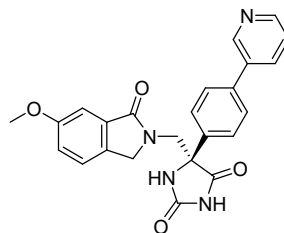

17

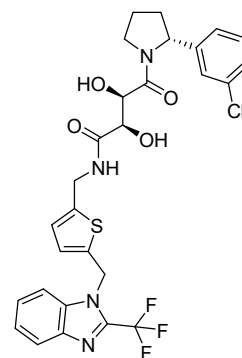

18

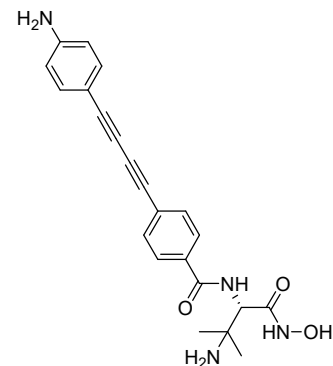

19

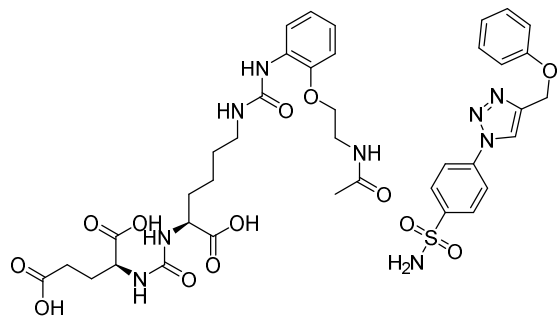

20

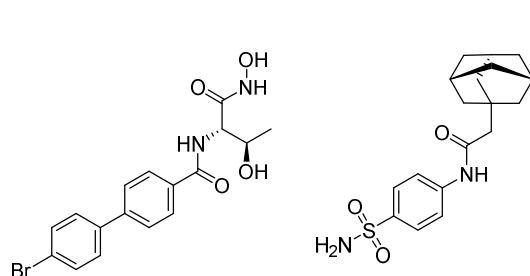

21

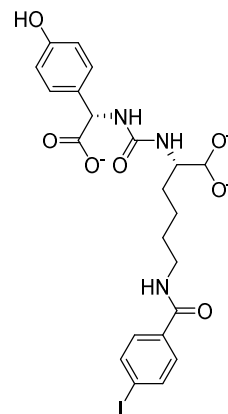

22

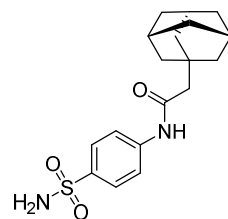

23

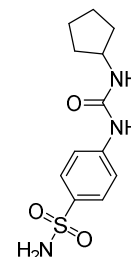

24

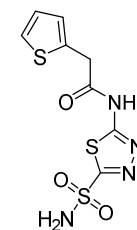

25

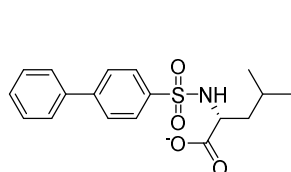

26

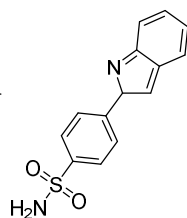

27

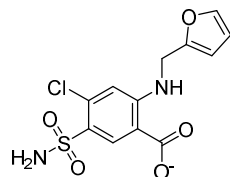

28

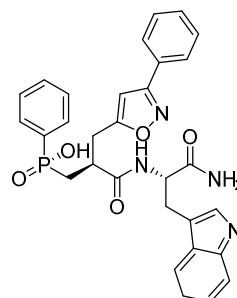

29

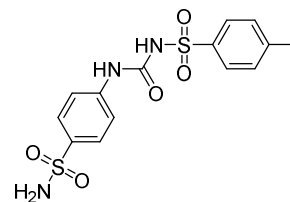

30

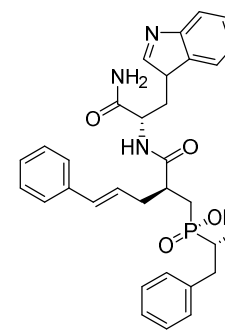

31

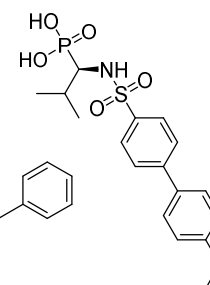

32

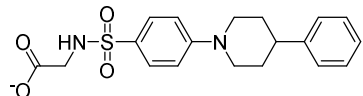

33

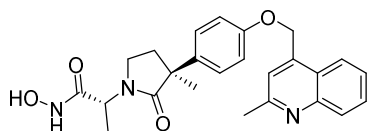

34

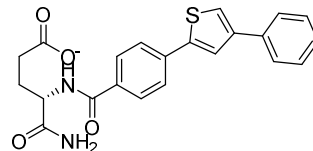

35

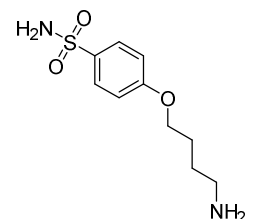

36

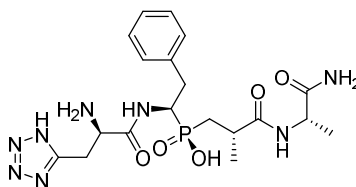

37

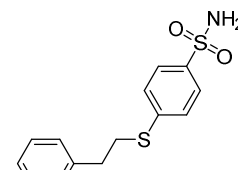

38

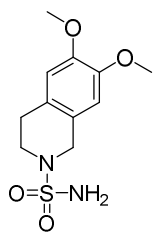

40

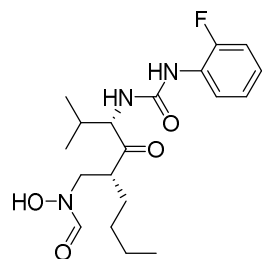

41

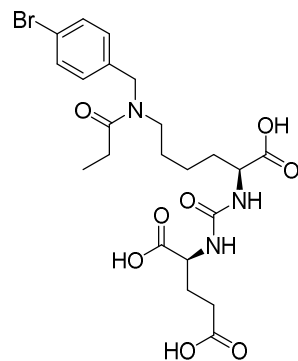

42

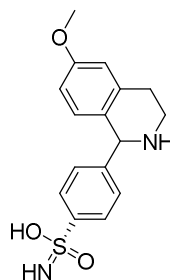

43

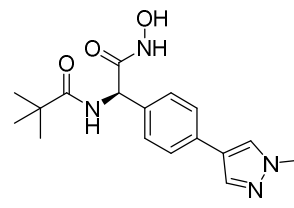

44

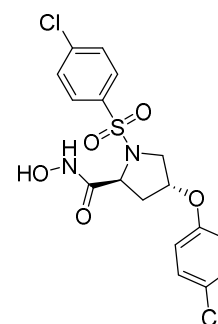

45

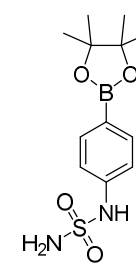

46

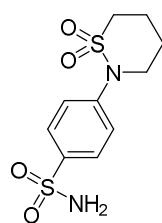

47

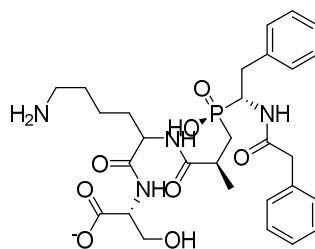

48

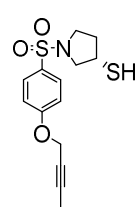

49

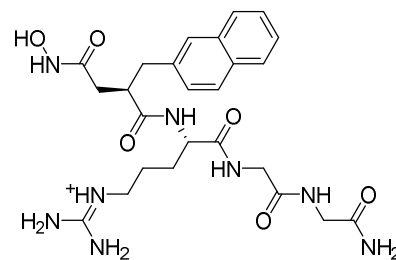

50

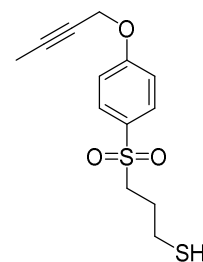

51

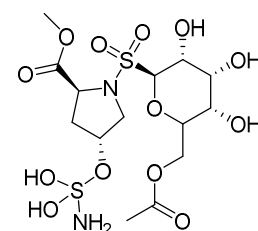

52

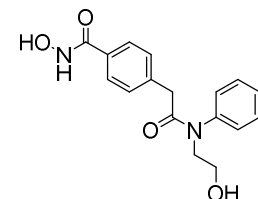

53

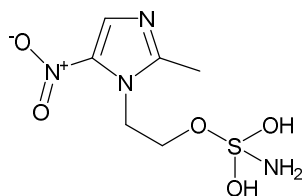

54

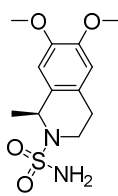

55

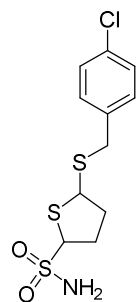

56

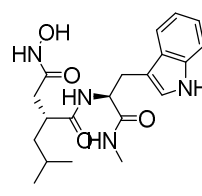

57

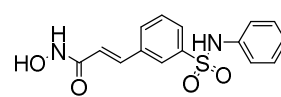

58

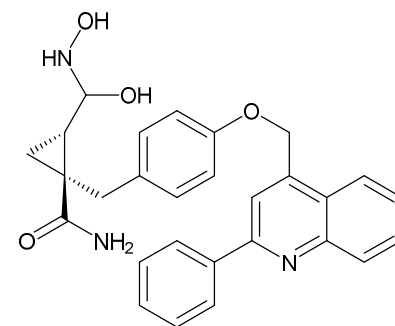

59

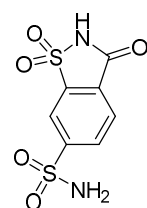

60

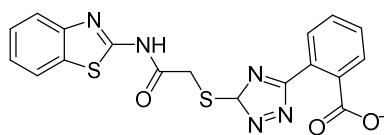

61

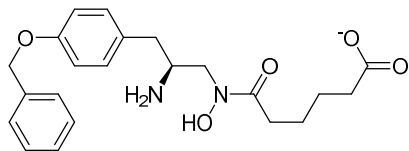

62

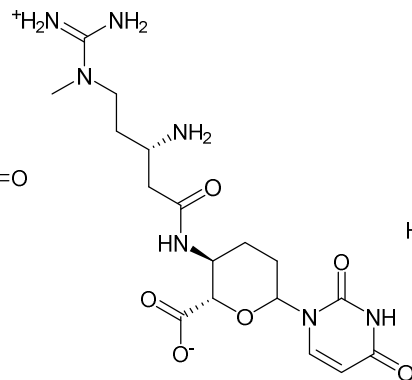

63

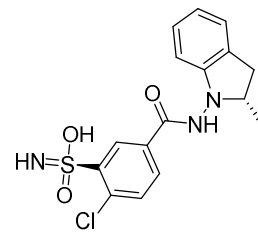

64

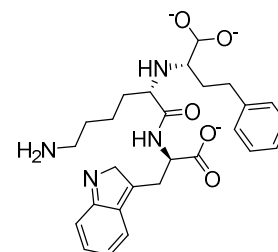

65

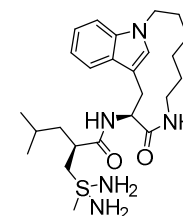

66

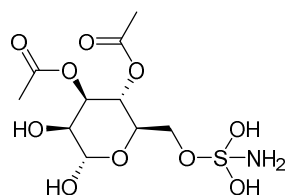

67

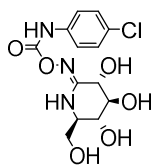

68

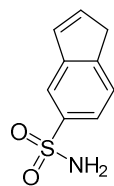

69

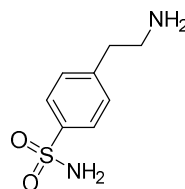

70

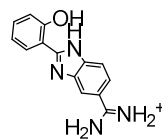

71

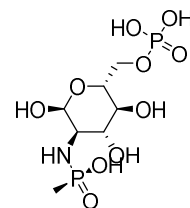

72

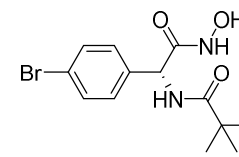

73

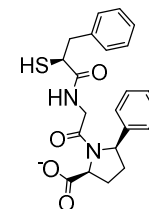

74

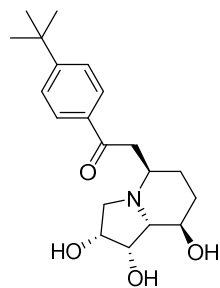

75

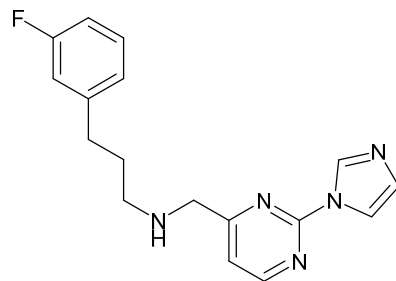

76

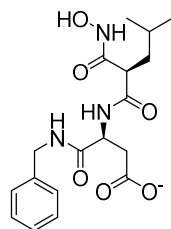

77

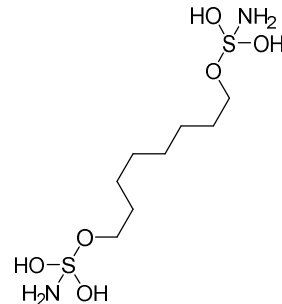

78

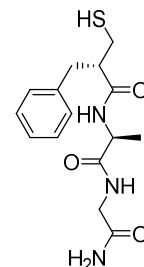

79

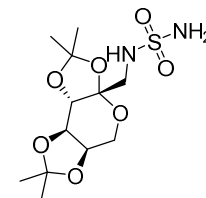

80

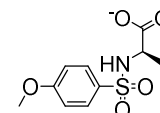

81

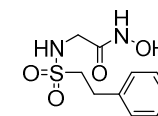

82

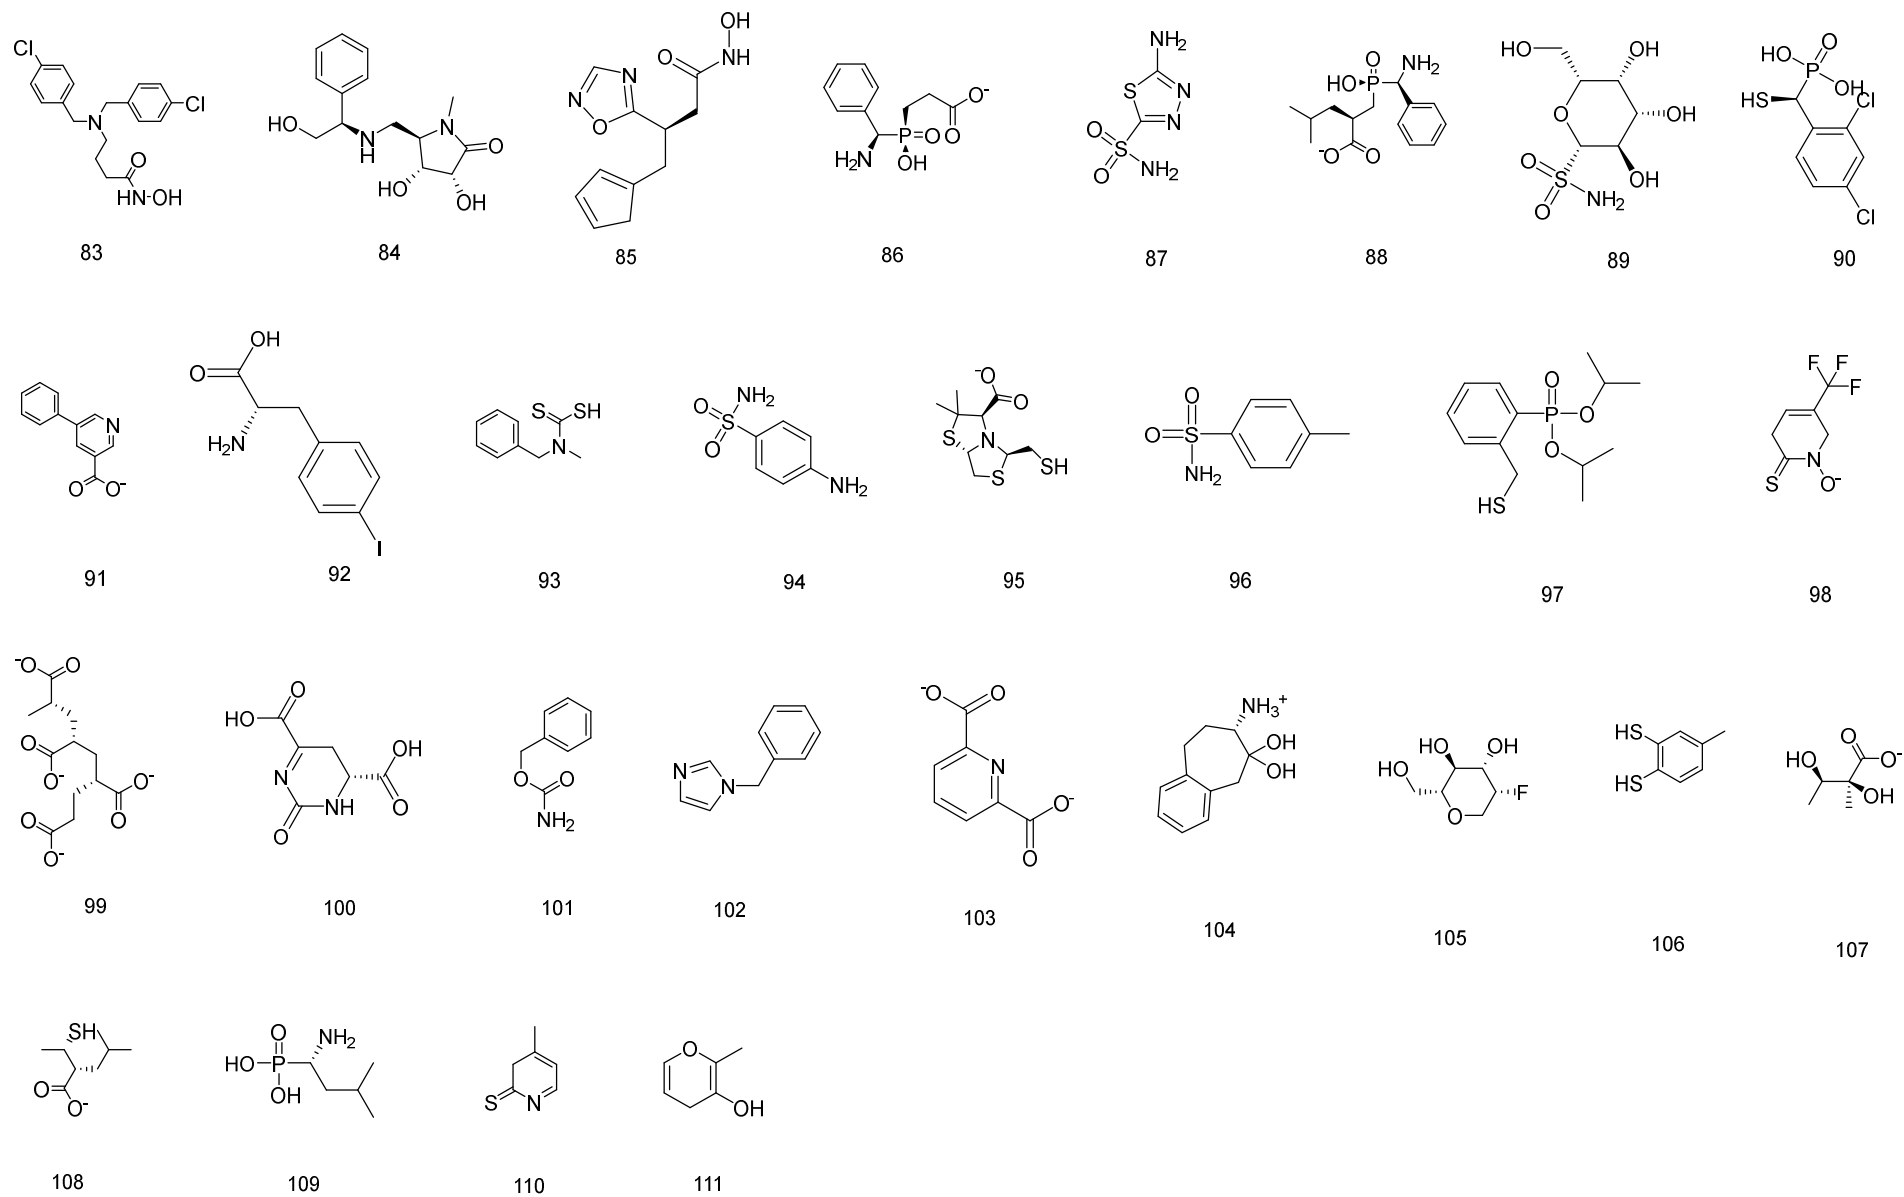

(a)

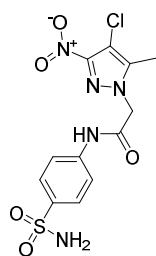

1

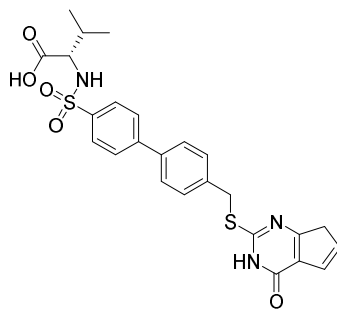

2

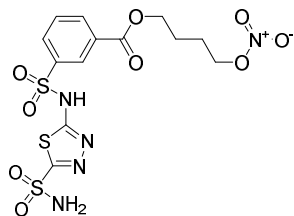

3

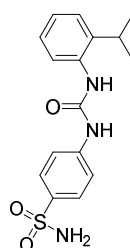

4

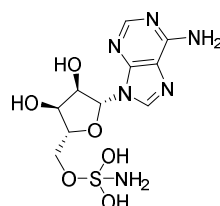

5

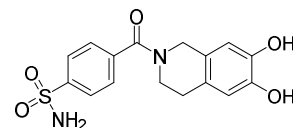

6

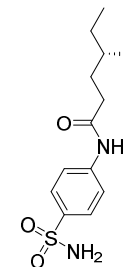

7

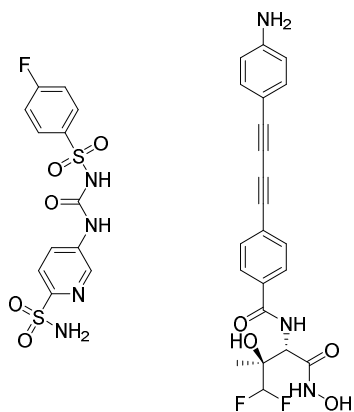

8

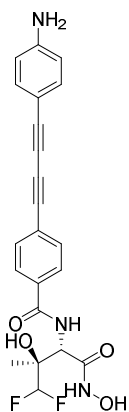

9

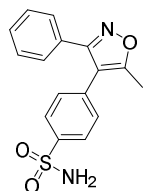

10

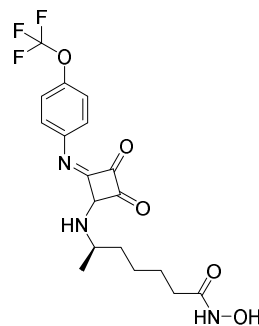

11

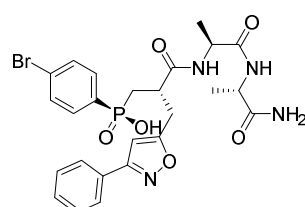

12

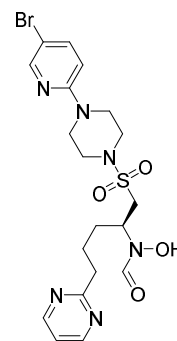

13

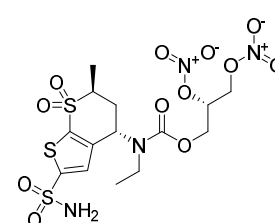

14

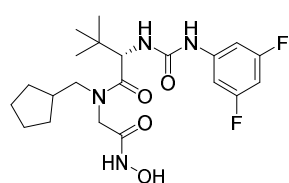

15

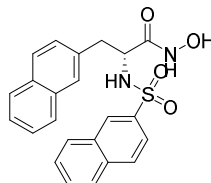

16

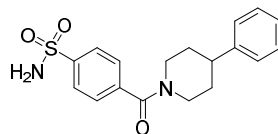

17

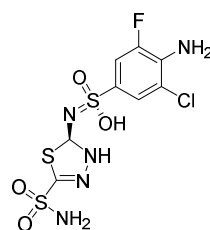

18

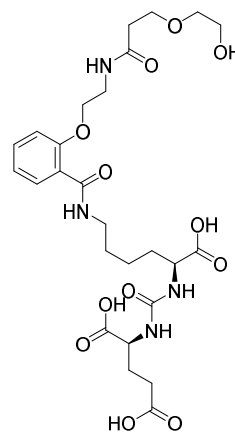

19

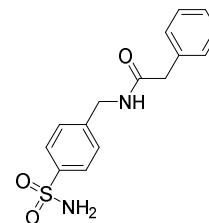

20

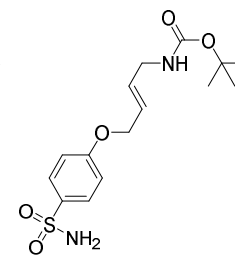

21



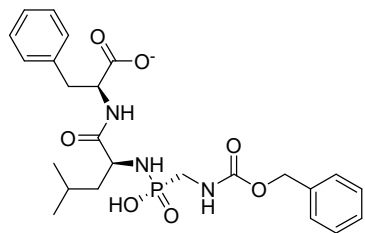

22

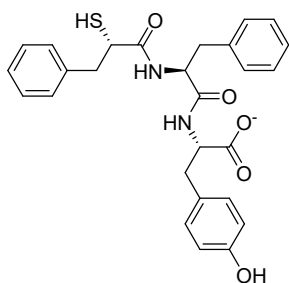

23

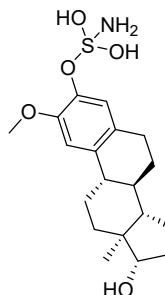

24

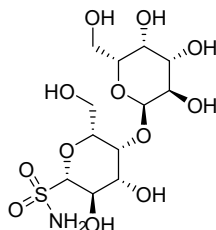

25

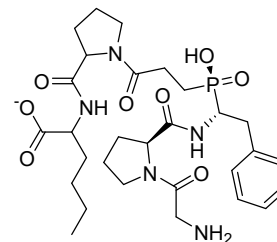

26

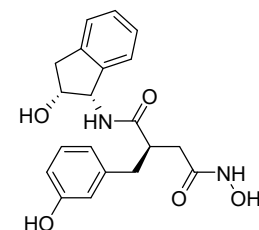

27

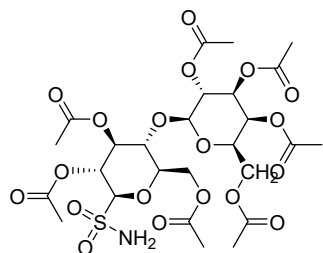

28

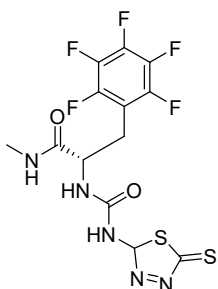

29

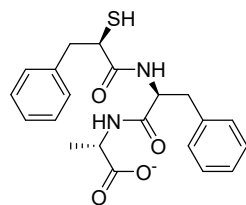

30

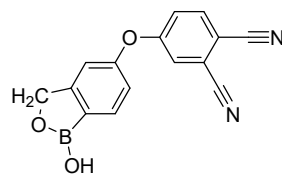

31

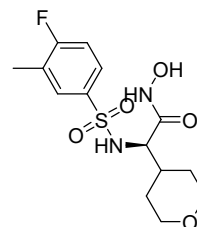

32

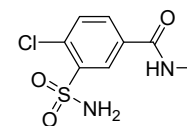

33

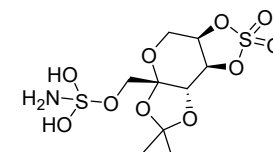

34

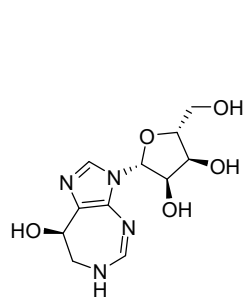

35

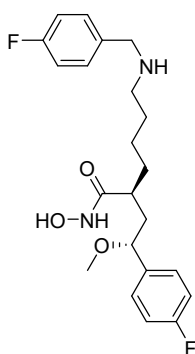

36

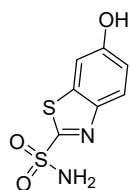

37

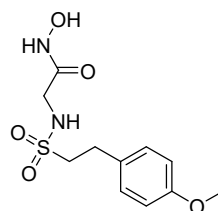

38

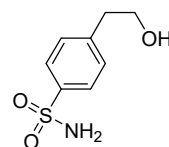

39

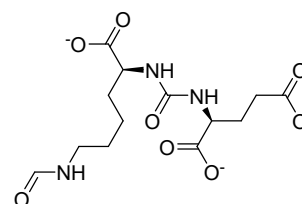

40

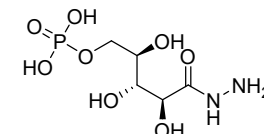

41

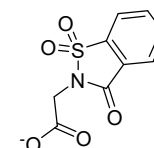

42

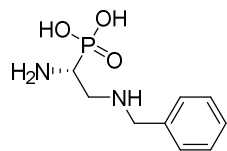

43

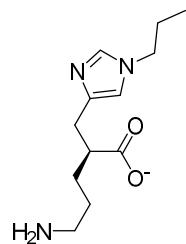

44

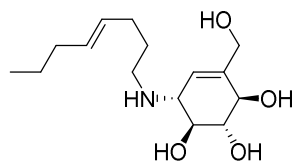

45

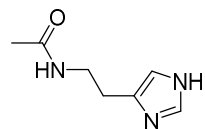

46

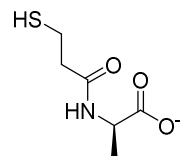

47

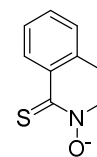

48

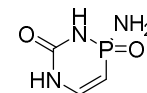

49

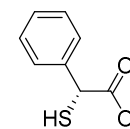

50

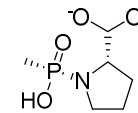

51

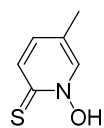

52

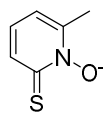

53

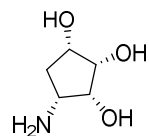

54

(b)

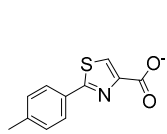

1

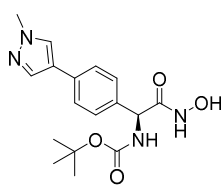

2

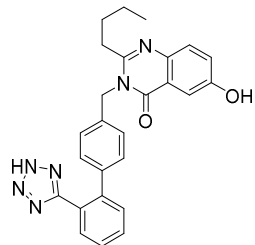

3

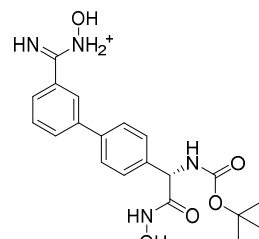

4

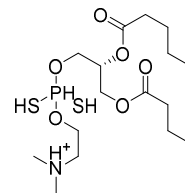

5

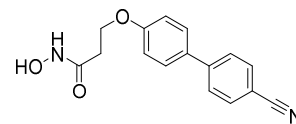

6

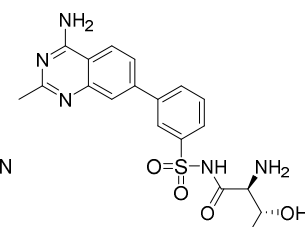

7

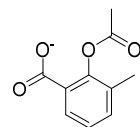

8

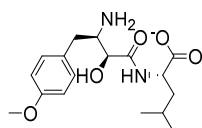

9

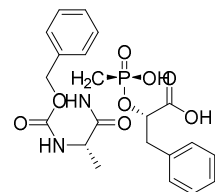

10

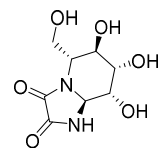

11

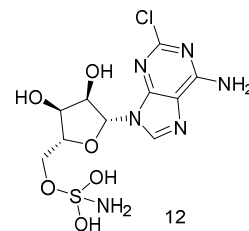

12

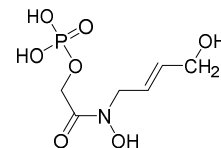

13

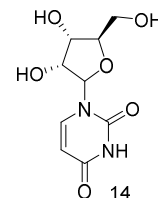

14

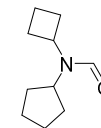

15

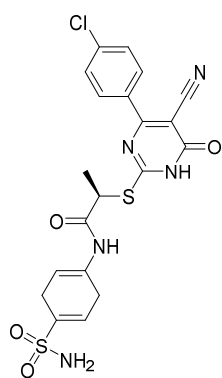

16

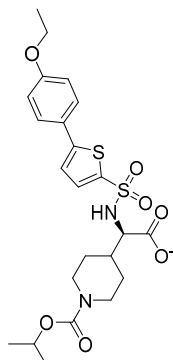

17

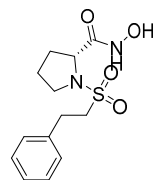

18

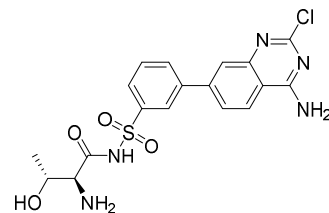

19

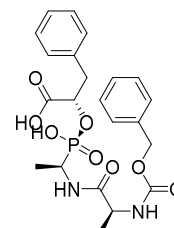

20

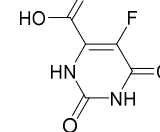

21

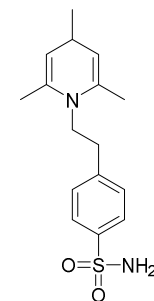

22

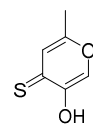

23

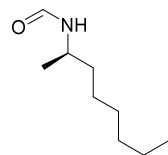

24

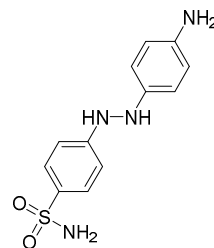

25

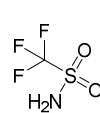

26

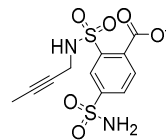

27

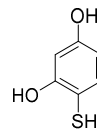

28

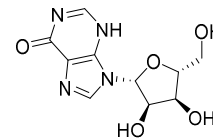

29

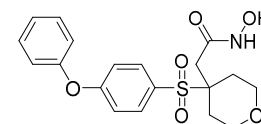

30

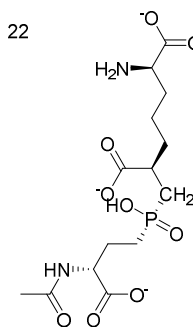

31

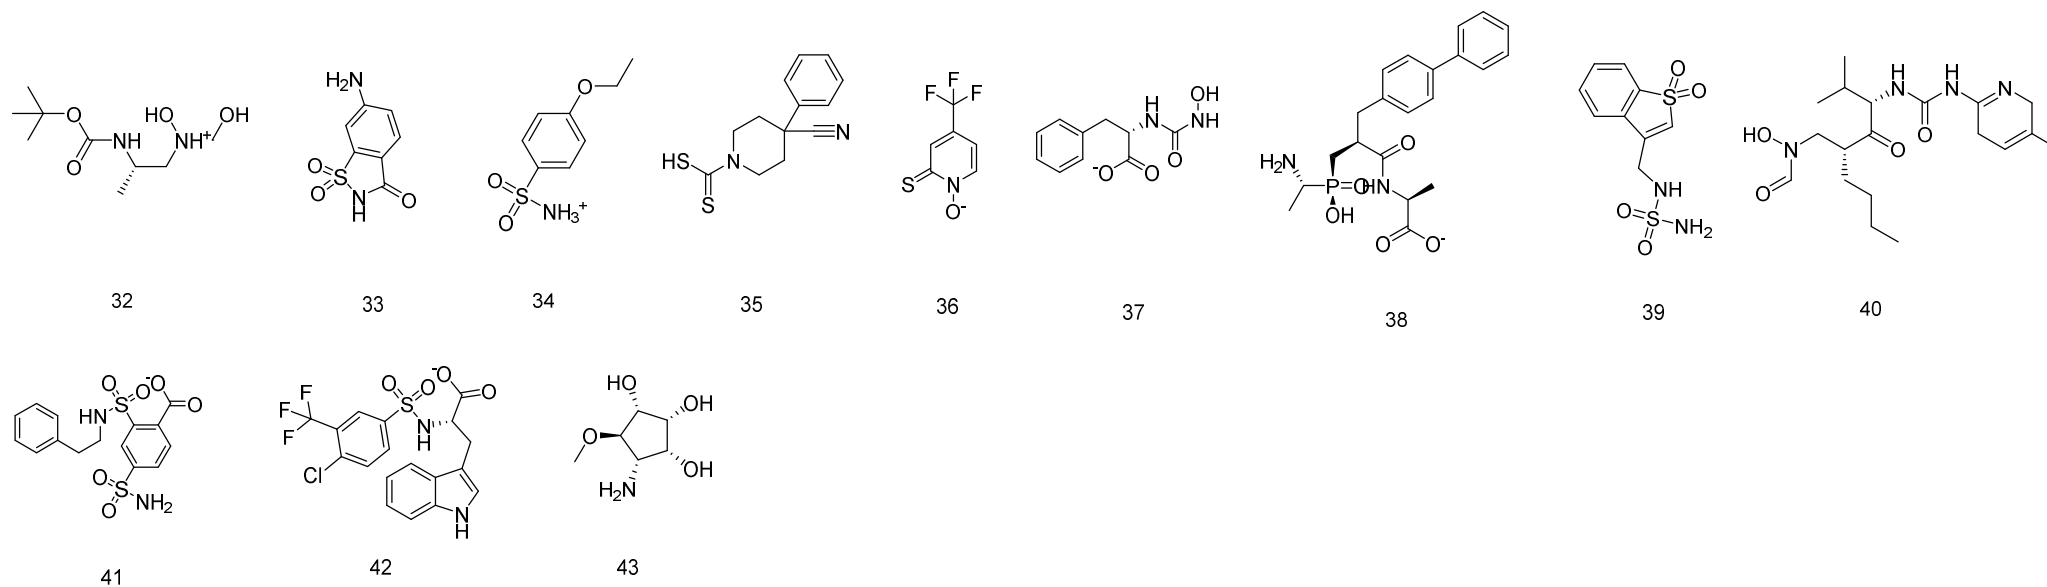

(c)

**Figure S2.** Structures of (a) training set, (b) internal test set, and (c) external test set molecules used for Model 5.

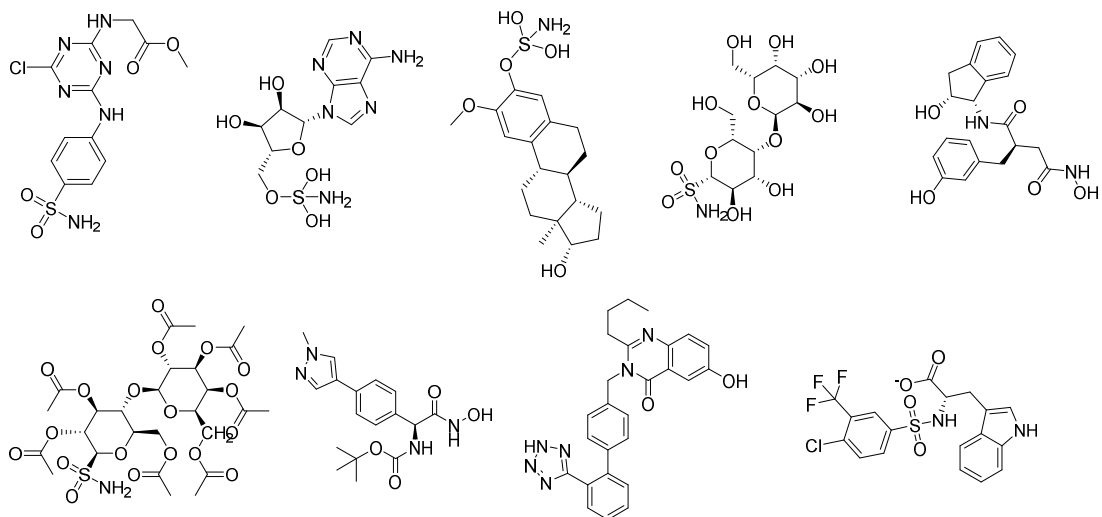

**Figure S3.** The false positive molecules predicted by Model 5.

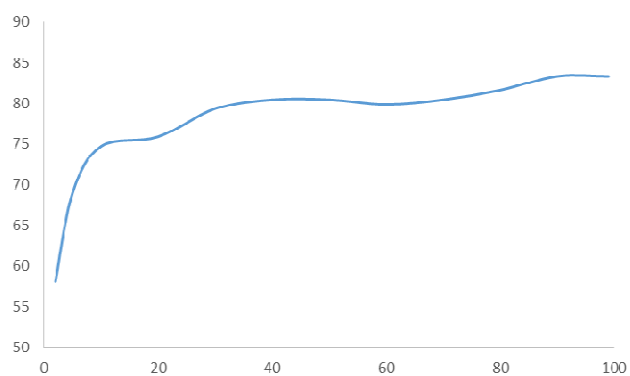

**Figure S4.** The learning curve derived from Model 5.

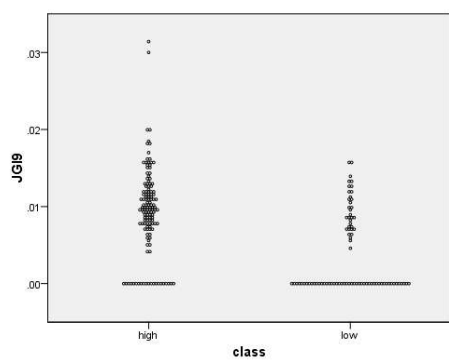

(a)

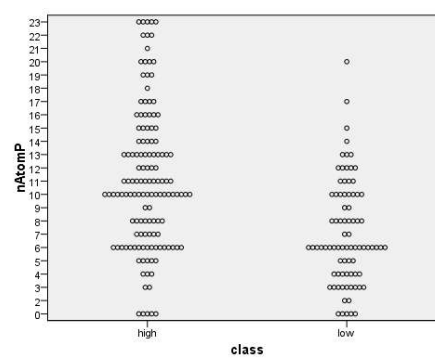

(b)

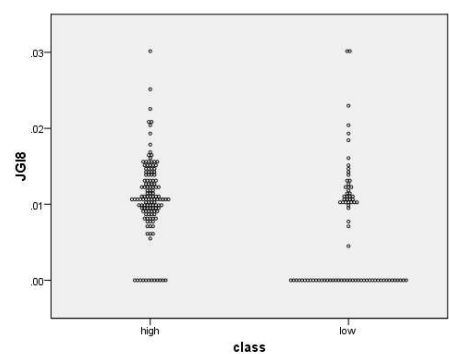

(c)

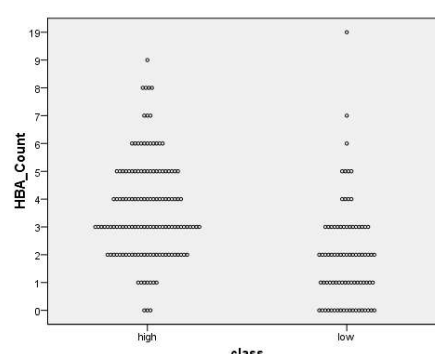

(d)

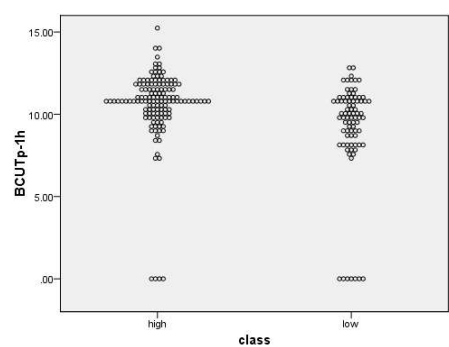

(e)

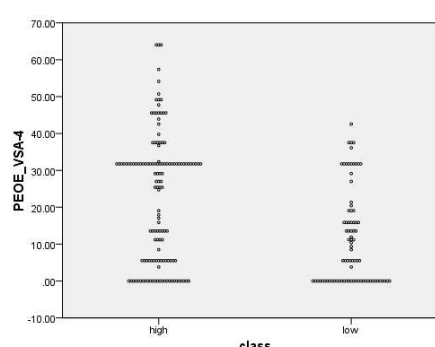

(f)

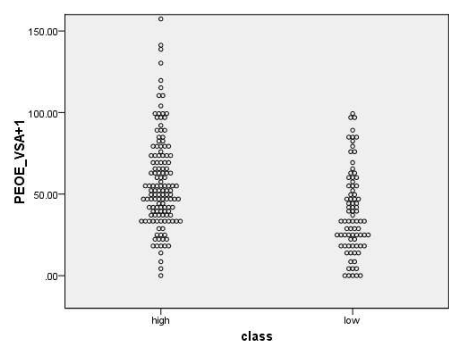

(g)

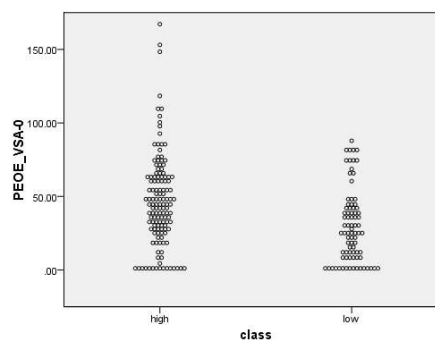

(h)

**Figure S5.** (a)-(h) Distribution of JGI9, nAtomP, JGI8, HBA\_Count, BCUTp-1h, PE-OE\_VSA-4, PEOE\_VSA+1, PE-OE\_VSA-0 among different classes, respectively.

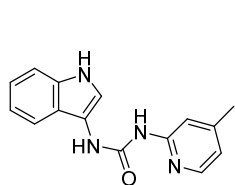

1

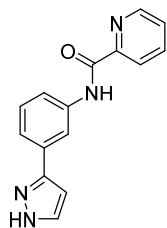

2

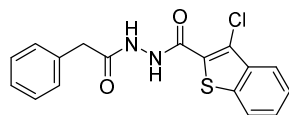

3

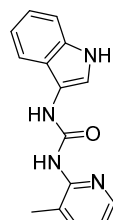

4

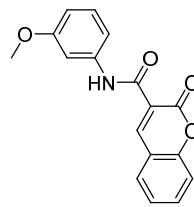

5

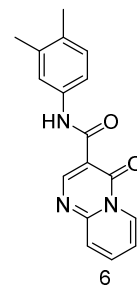

6

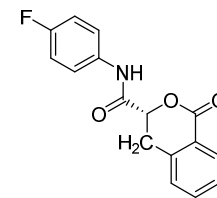

7

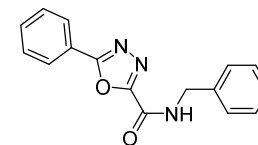

8

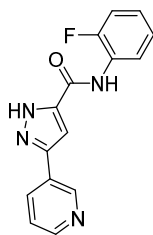

9

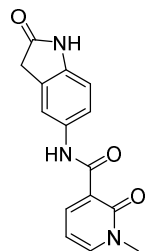

10

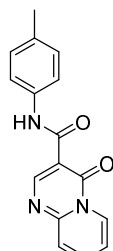

11

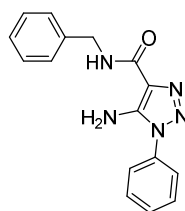

12

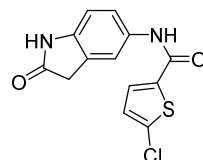

13

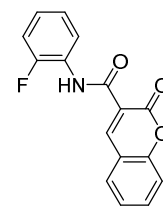

14

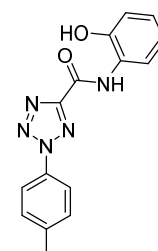

15

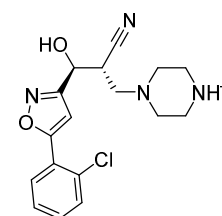

16

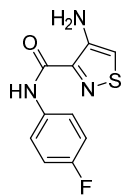

17

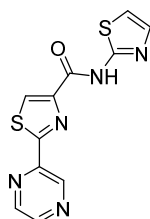

18

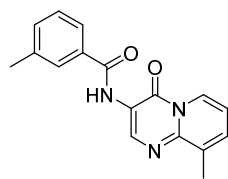

19

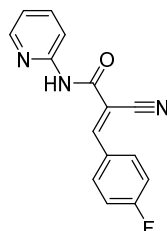

20

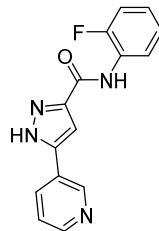

21

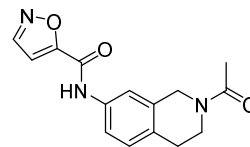

22

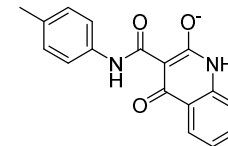

23

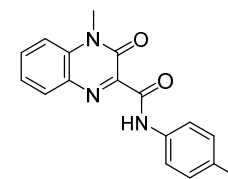

24

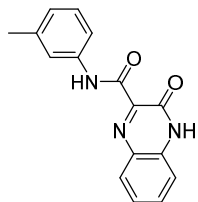

25

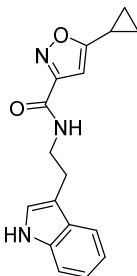

26

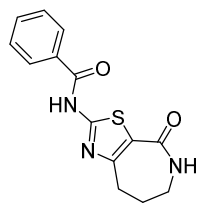

27

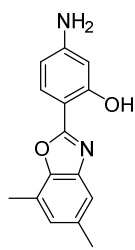

28

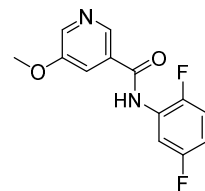

29

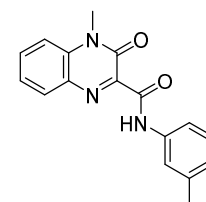

30

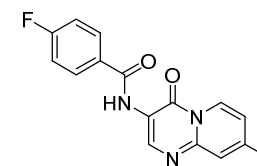

31

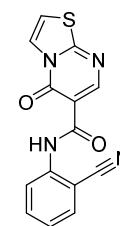

32

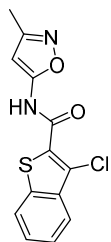

33

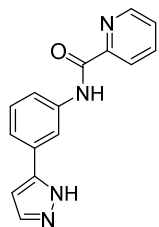

34

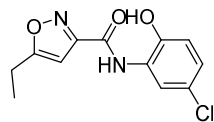

35

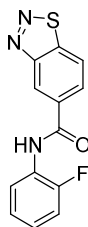

36

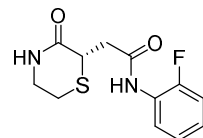

37

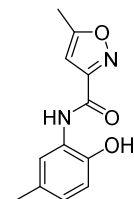

38

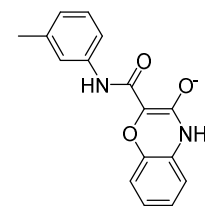

39

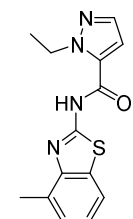

40

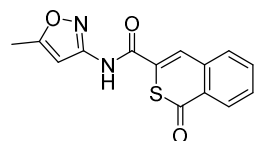

41

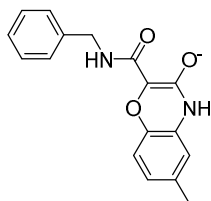

42

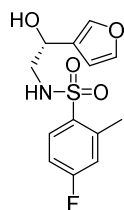

43

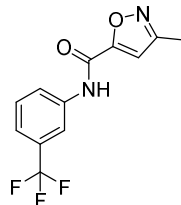

44

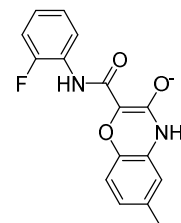

45

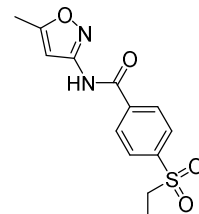

46

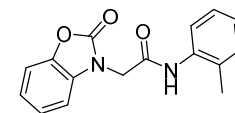

47

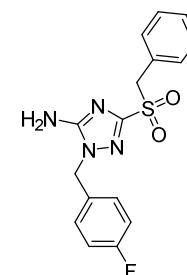

48

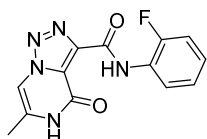

49

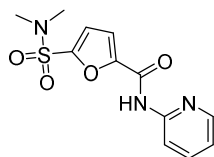

50

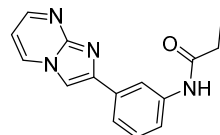

51

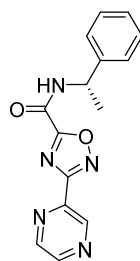

52

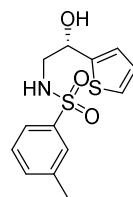

53

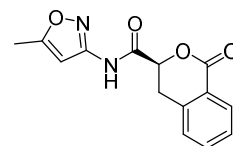

54

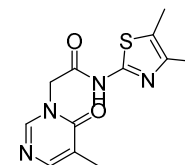

55

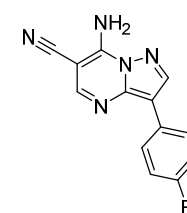

56

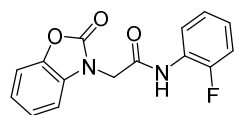

57

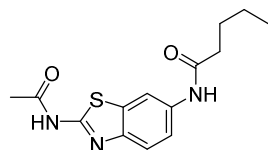

58

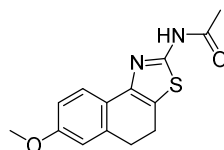

59

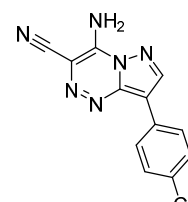

60

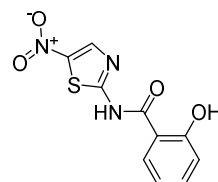

61

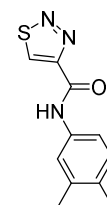

62

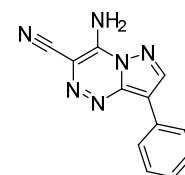

63

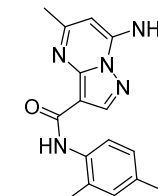

64



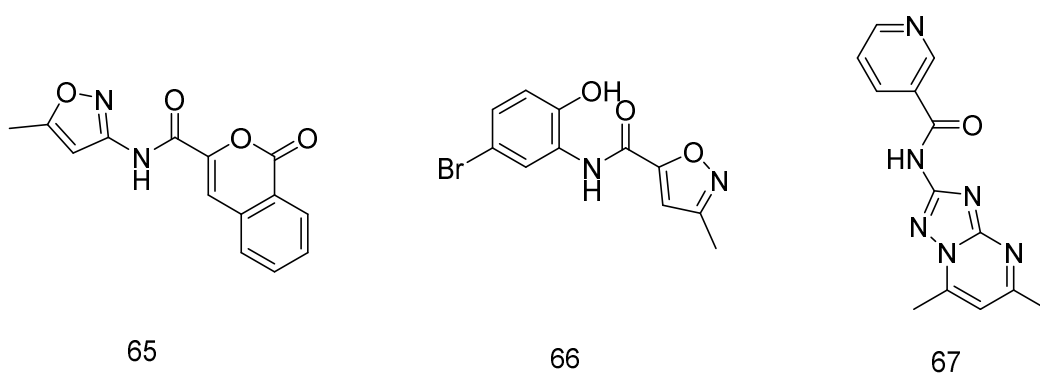

**Figure S6.** Structure of the selected 67 fragments.

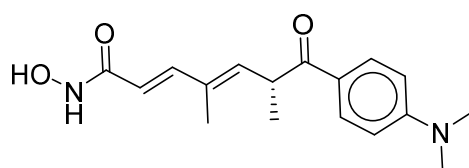

**Figure S7.** Structure of TSN in crystal complex 1C3R.

**Table S1.** Binding fragments with high frequency in the high activity data set  
of Zn<sup>2+</sup>-dependent metalloenzymes.

| MBP ID           | Ligand | PDB ID | Metalloenzymes       | Function | K <sub>i</sub> (nM) |
|------------------|--------|--------|----------------------|----------|---------------------|
| <b>MBP1-2-88</b> | F6W    | 6got   | Carbonic Anhydrase 2 | Lyase    | 0.40                |
|                  | FKE    | 6h36   | Carbonic Anhydrase 7 | Lyase    | 0.45                |
|                  | 51J    | 5aml   | Carbonic Anhydrase 2 | Lyase    | 0.70                |
|                  | 8F3    | 5n0e   | Carbonic Anhydrase 2 | Lyase    | 0.83                |
|                  | ANV    | 5ljq   | Carbonic Anhydrase 2 | Lyase    | 1.00                |
|                  | WWV    | 3n3j   | Carbonic Anhydrase 2 | Lyase    | 1.28                |
|                  | 45I    | 5amd   | Carbonic Anhydrase 2 | Lyase    | 2.80                |
|                  | 5NXV   | 5nxv   | Carbonic Anhydrase 2 | Lyase    | 3.50                |
|                  | D7A    | 3v7x   | Carbonic Anhydrase 2 | Lyase    | 4.85                |
|                  | FC4    | 5j8z   | Carbonic Anhydrase 2 | Lyase    | 5.00                |
|                  | 4KB    | 4z1k   | Carbonic Anhydrase 2 | Lyase    | 5.22                |
|                  | DF5    | 4z1e   | Carbonic Anhydrase 2 | Lyase    | 5.70                |
|                  | 3O1    | 4rfc   | Carbonic Anhydrase 2 | Lyase    | 6.13                |
|                  | OSP    | 2q1q   | Carbonic Anhydrase 2 | Lyase    | 7.00                |
|                  | 4KC    | 4z1j   | Carbonic Anhydrase 2 | Lyase    | 7.60                |
|                  | CQS    | 6b59   | Carbonic Anhydrase 2 | Lyase    | 8.20                |
|                  | 4RFD   | 4rfd   | Carbonic Anhydrase 2 | Lyase    | 8.90                |
|                  | 1ZFK   | 1zfk   | Carbonic Anhydrase 2 | Lyase    | 9.17                |
|                  | 1EZ    | 4ilx   | Carbonic Anhydrase 2 | Lyase    | 9.40                |
|                  | OYQ    | 3oyq   | Carbonic Anhydrase 2 | Lyase    | 10.30               |
|                  | 3EFT   | 3eft   | Carbonic Anhydrase 2 | Lyase    | 12.00               |
|                  | 9EB    | 5ny6   | Carbonic Anhydrase 2 | Lyase    | 13.50               |

|                 |       |      |                                                      |           |       |
|-----------------|-------|------|------------------------------------------------------|-----------|-------|
|                 | AYX   | 3n2p | Carbonic Anhydrase 2                                 | Lyase     | 15.00 |
|                 | DWH   | 3mna | Carbonic Anhydrase 2                                 | Lyase     | 16.32 |
|                 | R21   | 3nb5 | Carbonic Anhydrase 2                                 | Lyase     | 18.00 |
|                 | PIU   | 1ze8 | Carbonic Anhydrase 2                                 | Lyase     | 21.00 |
|                 | 4RUZ  | 4ruz | Carbonic Anhydrase 2                                 | Lyase     | 23.10 |
|                 | SU0   | 3ml2 | Carbonic Anhydrase 2                                 | Lyase     | 25.63 |
|                 | 4WA   | 5byi | Carbonic Anhydrase 2                                 | Lyase     | 30.70 |
|                 | OYS   | 3oys | Carbonic Anhydrase 2                                 | Lyase     | 31.18 |
|                 | 9E+08 | 5ny3 | Carbonic Anhydrase 2                                 | Lyase     | 33.90 |
|                 | S6I   | 3mzc | Carbonic Anhydrase 2                                 | Lyase     | 40.62 |
|                 | COX   | 2aw1 | Carbonic Anhydrase 2                                 | Lyase     | 43.00 |
|                 | 1GD   | 4itp | Carbonic Anhydrase 2                                 | Lyase     | 63.64 |
|                 | FUN   | 1z9y | Carbonic Anhydrase 2                                 | Lyase     | 65.00 |
|                 | BOS   | 2hd6 | Carbonic Anhydrase 2                                 | Lyase     | 66.45 |
|                 | 0FZ   | 3vbd | Carbonic Anhydrase 2                                 | Lyase     | 76.53 |
|                 | 8GE   | 5n1s | Carbonic Anhydrase 2                                 | Lyase     | 81.80 |
| <b>MBP2-1-9</b> | 5EN   | 5drr | UDP-3-O-acyl-N-acetylglucosamine<br>Deacetylase lpxC | Hydrolase | 0.00  |
|                 | 5EM   | 5drq | UDP-3-O-acyl-N-acetylglucosamine<br>Deacetylase lpxC | Hydrolase | 0.01  |
|                 | 541   | 2fv5 | ADAM 17 Endopeptidase                                | Hydrolase | 0.06  |
|                 | 615   | 3e8r | ADAM 17 Endopeptidase                                | Hydrolase | 0.18  |
|                 | 0LX   | 4dv8 | Anthrax Lethal Factor<br>Endopeptidase               | Hydrolase | 0.58  |
|                 | EL8   | 6g3o | Histone Deacetylase 2                                | Hydrolase | 0.58  |
|                 | L58   | 4fw5 | UDP-3-O-acyl-N-acetylglucosamine<br>Deacetylase lpxC | Hydrolase | 1.00  |
|                 | 5OG   | 5een | Histone Deacetylase                                  | Hydrolase | 1.10  |

|           |     |      |                                                      |           |       |
|-----------|-----|------|------------------------------------------------------|-----------|-------|
| MBP1-1-38 | QIX | 3e4a | Insulin-Degrading Enzyme                             | Hydrolase | 1.70  |
|           | 4U5 | 4zy1 | M17 Family Aminopeptidase                            | Hydrolase | 7.20  |
|           | KLJ | 4guy | Macrophage Metalloelastase                           | Hydrolase | 10.00 |
|           | GVR | 2ves | UDP-3-O-acyl-N-acetylglucosamine<br>Deacetylase lpxC | Hydrolase | 20.00 |
|           | RS2 | 966c | Fibroblast Collagenase                               | Hydrolase | 23.00 |
|           | 915 | 1yqy | Anthrax Lethal Factor<br>Endopeptidase               | Hydrolase | 24.00 |
|           | JT6 | 2jt6 | Stromelysin 1                                        | Hydrolase | 25.00 |
|           | 7JT | 5jf5 | Peptide Deformylase                                  | Hydrolase | 63.00 |
|           | 4TK | 4zx3 | M1 Family Aminopeptidase                             | Hydrolase | 65.00 |
|           | ZAF | 6cpa | Carboxypeptidase A1                                  | Hydrolase | 0.00  |
|           | BIR | 1r1h | Neprilysin                                           | Hydrolase | 1.20  |
|           | BHX | 3bhx | Glutamate Carboxypeptidase 2                         | Hydrolase | 1.90  |
|           | 1IU | 4bxk | Peptidyl-Dipeptidase A                               | Hydrolase | 11.21 |
|           | 5MR | 2ovz | Matrix Metalloproteinase-9                           | Hydrolase | 13.00 |
|           | RXP | 1hv5 | Stromelysin 3                                        | Hydrolase | 22.91 |
|           | 3A2 | 3aho | Oligopeptidase                                       | Hydrolase | 88.90 |
|           | 3A1 | 3ahn | Oligopeptidase                                       | Hydrolase | 90.10 |
| MBP1-1-12 | 686 | 4x3r | Glutamate Carboxypeptidase 2                         | Hydrolase | 0.01  |
|           | J37 | 4ngq | Glutamate Carboxypeptidase 2                         | Hydrolase | 1.57  |
|           | J42 | 4ngt | Glutamate Carboxypeptidase 2                         | Hydrolase | 3.89  |
|           | J34 | 4ngs | Glutamate Carboxypeptidase 2                         | Hydrolase | 7.60  |
|           | J31 | 4ngp | Glutamate Carboxypeptidase 2                         | Hydrolase | 10.99 |
|           | J96 | 4ngn | Glutamate Carboxypeptidase 2                         | Hydrolase | 28.10 |
|           | 2QM | 4oc5 | Glutamate Carboxypeptidase 2                         | Hydrolase | 85.05 |
| MBP1-2-81 | 5L2 | 4zx0 | Carbonic Anhydrase 2                                 | Lyase     | 10.00 |
|           | SG7 | 3t85 | Carbonic Anhydrase 2                                 | Lyase     | 11.30 |

|     |      |                      |       |       |
|-----|------|----------------------|-------|-------|
| 1VQ | 5o07 | Carbonic Anhydrase 2 | Lyase | 33.90 |
| SMS | 1eou | Carbonic Anhydrase 2 | Lyase | 36.00 |
| O59 | 3ibl | Carbonic Anhydrase 2 | Lyase | 74.29 |
| EO7 | 6c7x | Carbonic Anhydrase 2 | Lyase | 96.56 |

---

**Table S2.** Predictive accuracy of models using IBK method with different K values.

| K     | AttributeSelectedClassifier_IBK |       |       |             | IBK   |              |              |       |
|-------|---------------------------------|-------|-------|-------------|-------|--------------|--------------|-------|
| value | 1                               | 2     | 3     | 4           | 1     | 2            | 3            | 4     |
| 1     | 68.92                           | 68.34 | 68.13 | 71.36       | 70.79 | 72.24        | 68.12        | 71.92 |
| 2     | 69.11                           | 69.47 | 69.2  | 71.83       | 69.99 | 70.88        | 67.54        | 72.39 |
| 3     | 71.76                           | 70.11 | 69.63 | 71.91       | 71.59 | 73.67        | 68.48        | 72.74 |
| 4     | 72.12                           | 71.75 | 70.47 | 72.44       | 69.74 | 72.3         | 71.48        | 72.36 |
| 5     | 71.65                           | 71.62 | 70.41 | 73.99       | 68.71 | 72.99        | 72.33        | 71.9  |
| 6     | 71.79                           | 72.31 | 71.08 | 73.36       | 69.81 | 73           | 72.98        | 72.36 |
| 7     | 71.73                           | 72.67 | 70.98 | 74.68       | 70.66 | 73.27        | 74.42        | 72.87 |
| 8     | 72.08                           | 71.91 | 72.08 | 74.12       | 72.52 | 73.47        | 73.68        | 73.69 |
| 9     | 71.73                           | 72.82 | 71.78 | 74.86       | 73.83 | 74.09        | 74.72        | 73.46 |
| 10    | 72.02                           | 72.08 | 72.84 | 74.39       | 72.93 | 72.26        | 74.47        | 74.27 |
| 11    | 71.85                           | 72.59 | 71.95 | 75.54       | 72.65 | 74.96        | 74.83        | 73.81 |
| 12    | 72.15                           | 72.71 | 73    | 74.39       | 72.46 | 74.8         | 74.42        | 74.68 |
| 13    | 71.68                           | 73.05 | 72.5  | <b>75.6</b> | 72.76 | <b>75.96</b> | 74.87        | 75.02 |
| 14    | 72.48                           | 72.87 | 72.95 | 75.24       | 73.44 | 75.78        | 74.94        | 74.9  |
| 15    | 72.54                           | 72.99 | 72.35 | 75.48       | 73.41 | 75.9         | 75.8         | 75.54 |
| 16    | 72.38                           | 73.28 | 72.77 | 75.14       | 74.26 | 74.98        | 75.64        | 75.71 |
| 17    | 72.44                           | 72.86 | 72.54 | 75.48       | 74.9  | 75.77        | <b>76.44</b> | 76.11 |

|     |              |              |              |             |              |       |       |             |
|-----|--------------|--------------|--------------|-------------|--------------|-------|-------|-------------|
| 18  | 72.72        | 73.22        | 73.12        | 75.37       | 75.41        | 74.81 | 75.64 | 76.11       |
| 19  | 72.85        | 73.32        | 72.76        | 75.43       | 75.47        | 75.61 | 76.16 | 75.93       |
| 20  | 73.3         | 73.68        | 73.18        | 75.13       | 75.98        | 74.75 | 75.83 | 75.58       |
| 21  | 73.24        | 73.78        | 73.52        | 75.49       | <b>76.11</b> | 75.02 | 76.28 | 75.7        |
| 22  | 73.58        | <b>73.97</b> | 73.82        | 75.2        | 75.58        | 74.21 | 75.47 | 75.3        |
| 23  | <b>73.82</b> | 73.05        | 73.65        | 75.54       | 75.47        | 74.74 | 75.76 | 75.59       |
| 24  | 73.58        | 73.52        | 73.52        | 75.37       | 74.96        | 74.35 | 75.29 | 75.47       |
| 25  | 73.7         | 73.76        | 73.88        | 75.42       | 74.79        | 74.39 | 75.54 | <b>76.5</b> |
| 26  | 73.3         | 73.3         | 74.21        | 75.02       | 74.9         | 74.1  | 74.78 | 75.89       |
| 27  | 73.75        | 73.29        | <b>74.27</b> | 75.03       | 74.84        | 74.11 | 75.47 | 76.4        |
| 28  | 73.75        | 73.81        | 73.97        | 75.02       | 75.19        | 73.88 | 74.85 | 75.59       |
| 29  | 73.68        | 73.74        | 74.21        | 75.31       | 74.95        | 73.93 | 75.42 | 76.18       |
| 30  | 73.69        | 73.81        | 74.04        | 75.07       | 75.12        | 73.42 | 74.96 | 75.78       |
| max | 73.82        | 73.97        | 74.27        | <b>75.6</b> | 76.11        | 75.96 | 76.44 | <b>76.5</b> |

**Table S3.** Predictive accuracy of models using J48 method with different Min Num Obj values.

| Min Num   | AttributeSelectedClassifier_J48 |              |              |              | J48         |              |              |              |
|-----------|---------------------------------|--------------|--------------|--------------|-------------|--------------|--------------|--------------|
| Obj value | 1                               | 2            | 3            | 4            | 1           | 2            | 3            | 4            |
| 2         | 71.73                           | 74.48        | 69.32        | 72.75        | 68.51       | 72.42        | 67.34        | 71.34        |
| 3         | 71.4                            | 74.08        | 69.81        | 72.97        | 69.13       | 71.68        | 68.02        | 71.54        |
| 4         | 71.82                           | 75.42        | 70.01        | 73.73        | 70.63       | 72.43        | 67.52        | 73.32        |
| 5         | <b>72.36</b>                    | <b>75.43</b> | 69.81        | <b>73.97</b> | 70.88       | 73.61        | 67.72        | 74.02        |
| 6         | 72.18                           | 74.98        | 69.28        | 73.72        | 70.72       | <b>73.84</b> | 67.82        | <b>74.12</b> |
| 7         | 71.68                           | 74.03        | 69.42        | 73.89        | 70.02       | 73.3         | 69           | 73.54        |
| 8         | 72.07                           | 73.5         | 70.23        | 73.19        | 69.8        | 72.74        | 69.09        | 73.12        |
| 9         | 71.38                           | 73.26        | 69.82        | 72.54        | <b>71.3</b> | 71.99        | 69.27        | 72.99        |
| 10        | 71.62                           | 73.5         | 70.24        | 72.46        | 71.09       | 71.75        | 69.84        | 73.25        |
| 11        | 71.41                           | 73.44        | 69.75        | 71.73        | 69.71       | 71.63        | 68.96        | 72.11        |
| 12        | 70.99                           | 72.64        | 70.58        | 71.59        | 69.39       | 71.34        | 69.38        | 71.51        |
| 13        | 70.4                            | 72.06        | 70.2         | 71.35        | 69.85       | 70.37        | 69.26        | 71.62        |
| 14        | 70.1                            | 72.39        | 70.79        | 71.7         | 70.13       | 71.52        | 69.58        | 72.15        |
| 15        | 70.22                           | 71.77        | <b>71.49</b> | 71.42        | 69.9        | 71.24        | <b>70.03</b> | 71.33        |
| max       | 72.36                           | <b>75.43</b> | 71.49        | 73.97        | 71.3        | 73.84        | 70.03        | 74.12        |



**Table S4.** Information of (a) training set, (b) internal test set and (c) external test set molecules.

(a)

| No. | Ligand<br>name | PDB<br>ID | Ki (nM) | Class | No. | Ligand<br>name | PDB<br>ID | Ki (nM) | Class |
|-----|----------------|-----------|---------|-------|-----|----------------|-----------|---------|-------|
| 1   | DWH            | 3mna      | 16.32   | high  | 2   | AYX            | 3n2p      | 15.00   | high  |
| 3   | R21            | 3nb5      | 18.00   | high  | 4   | CQS            | 6b59      | 8.20    | high  |
| 5   | SU0            | 3ml2      | 25.63   | high  | 6   | 4KC            | 4z1j      | 7.60    | high  |
| 7   | D7A            | 3v7x      | 4.85    | high  | 8   | 9E08           | 5ny3      | 33.90   | high  |
| 9   | BOS            | 2hd6      | 66.45   | high  | 10  | 686            | 4x3r      | 0.01    | high  |
| 11  | J42            | 4ngt      | 3.89    | high  | 12  | OYS            | 3oys      | 31.18   | high  |
| 13  | DF5            | 4z1e      | 5.70    | high  | 14  | 8F3            | 5n0e      | 0.83    | high  |
| 15  | GNQ            | 2hh5      | 32.00   | high  | 16  | 3QR            | 4riu      | 50.00   | high  |
| 17  | Z93            | 3lea      | 0.80    | high  | 18  | 3LGP           | 3lgp      | 2.00    | high  |
| 19  | 5EM            | 5drq      | 0.01    | high  | 20  | J34            | 4ngs      | 7.60    | high  |
| 21  | ANV            | 5ljq      | 1.00    | high  | 22  | L58            | 4fw5      | 1.00    | high  |
| 23  | 1EZ            | 4ilx      | 9.40    | high  | 24  | 2QM            | 4oc5      | 85.05   | high  |
| 25  | S6I            | 3mzc      | 40.62   | high  | 26  | 1GO            | 4iwz      | 60.60   | high  |
| 27  | BDL            | 3ehx      | 25.00   | high  | 28  | 8GE            | 5n1s      | 81.80   | high  |
| 29  | FUN            | 1z9y      | 65.00   | high  | 30  | 5MR            | 2ovz      | 13.00   | high  |
| 31  | 1ZFK           | 1zfk      | 9.17    | high  | 32  | RXP            | 1hv5      | 22.91   | high  |
| 33  | FIN            | 1zvx      | 1.73    | high  | 34  | IN7            | 1b8y      | 14.00   | high  |

|    |      |          |              |      |    |      |          |              |      |
|----|------|----------|--------------|------|----|------|----------|--------------|------|
| 35 | 541  | 2fv5     | 0.06         | high | 36 | E37  | 4efs     | 17.82        | high |
| 37 | 4RFD | 4rfd     | 8.90         | high | 38 | 1IU  | 4bxk     | 11.21        | high |
| 39 | F6W  | 6got     | 0.40         | high | 40 | 3IGP | 3igp     | 22.59        | high |
| 41 | FHF  | 3u7<br>m | 35.10        | high | 42 | J37  | 4ngq     | 1.57         | high |
| 43 | 0FZ  | 3vbd     | 76.53        | high | 44 | 4U5  | 4zy1     | 7.20         | high |
| 45 | QI3  | 3qj0     | 6300.00      | low  | 46 | BON  | 3mn<br>u | 66.45        | high |
| 47 | OSP  | 2q1q     | 7.00         | high | 48 | 3A1  | 3ahn     | 90.10        | high |
| 49 | 283  | 2oi0     | 30.40        | high | 50 | QIX  | 3e4a     | 1.70         | high |
| 51 | 440  | 3b92     | 10.00        | high | 52 | 5L2  | 4zx0     | 10.00        | high |
| 53 | 5OJ  | 5ef7     | 1.00         | high | 54 | 1VQ  | 5o07     | 33.90        | high |
| 55 | DT9  | 3po6     | 23.64        | high | 56 | 7O8  | 5mjn     | 2.90         | high |
| 57 | GM6  | 1pw<br>u | 2100.00      | low  | 58 | 5OG  | 5een     | 1.10         | high |
| 59 | 615  | 3e8r     | 0.18         | high | 60 | IL5  | 4xe1     | 77.30        | high |
| 61 | 752  | 5lsc     | 1200.00      | low  | 62 | HA2  | 2vj8     | 2.00         | high |
| 63 | BLO  | 2z3h     | 23000.0<br>0 | low  | 64 | 3BL1 | 3bl1     | 11436.3<br>0 | low  |
| 65 | X95  | 2x95     | 11300.0<br>0 | low  | 66 | SRS  | 1mm<br>r | 4000.00      | low  |
| 67 | SG7  | 3t85     | 11.30        | high | 68 | GHR  | 3d52     | 520000.      | low  |

|    |      |      |         |      |    |     |         |         |      |
|----|------|------|---------|------|----|-----|---------|---------|------|
|    |      |      |         |      |    |     | 00      |         |      |
| 69 | 2QOA | 2qoa | 52.00   | high | 70 | ZYX | 2nng    | 21000.0 | low  |
|    |      |      |         |      |    |     | 0       |         |      |
| 71 | 122  | 1gi4 | 65.00   | high | 72 | NNG | 2p53    | 35.00   | high |
| 73 | 4TK  | 4zx3 | 65.00   | high | 74 | TI3 | 1qf2    | 1200.00 | low  |
| 75 | HN4  | 3ejr | 2.70    | high | 76 | S8F | 4v3v    | 2700.00 | low  |
|    |      |      | 88000.0 |      |    |     |         |         |      |
| 77 | 0ZB  | 1a86 | 0       | low  | 78 | O59 | 3ibl    | 74.29   | high |
| 79 | 0D3  | 1jao | 1200.00 | low  | 80 | B19 | 2h15    | 2713.99 | low  |
|    |      |      |         |      |    |     | 10700.0 |         |      |
| 81 | TBL  | 3ehy | 1400.00 | low  | 82 | KLG | 3rts    | 0       | low  |
| 83 | QI1  | 3qiy | 4600.00 | low  | 84 | GB7 | 3ddg    | 1000.00 | low  |
| 85 | 7JT  | 5jf5 | 63.00   | high | 86 | 4ZN | 5cbm    | 17.00   | high |
| 87 | 1SA  | 2hnc | 60.00   | high | 88 | 4QP | 4zqt    | 2300.00 | low  |
| 89 | 1SD  | 3hkq | 4550.00 | low  | 90 | SDF | 3iog    | 1095.45 | low  |
|    |      |      | 37000.0 |      |    |     |         | 920000. |      |
| 91 | 0LO  | 4dsy | 0       | low  | 92 | PHI | 1tf9    | 00      | low  |
|    |      |      |         |      |    |     | 5wc     | 100000. |      |
| 93 | P58  | 3p58 | 25.40   | high | 94 | 4NZ | m       | 00      | low  |
|    |      |      |         |      |    |     |         | 25000.0 |      |
| 95 | 9BZ  | 5ewa | 7549.83 | low  | 96 | 6LH | 5jnc    | 0       | low  |
|    |      |      |         |      |    |     |         |         |      |
| 97 | IFS  | 3iof | 9165.15 | low  | 98 | 7FH | 4q8x    | 270000. | low  |

|     |     |      |                |     |     |      |      |                |     |
|-----|-----|------|----------------|-----|-----|------|------|----------------|-----|
|     |     |      |                |     |     |      | 00   |                |     |
| 99  | PAY | 2v77 | 8700.00        | low | 100 | OTD  | 2eg7 | 1300.00        | low |
| 101 | FK8 | 6h29 | 2400.00        | low | 102 | 1BN  | 2afx | 7100.00        | low |
| 103 | PDC | 4ih3 | 15200.0<br>0   | low | 104 | 5MFR | 5mfr | 50000.0<br>0   | low |
| 105 | FMF | 1qx1 | 7500000<br>.00 | low | 106 | TLD  | 2z94 | 1400.00        | low |
| 107 | 23B | 4bt5 | 1720000<br>.00 | low | 108 | O2S  | 5om9 | 56000.0<br>0   | low |
| 109 | 2WW | 4pvb | 249000.<br>00  | low | 110 | 4H2  | 4q90 | 7000000<br>.00 | low |
| 111 | TM4 | 4mlt | 1400000<br>.00 | low |     |      |      |                |     |

(b)

| No. | Ligand<br>name | PDB<br>ID | Ki (nM) | Class | No. | Ligand<br>name | PDB<br>ID | Ki (nM) | Class |
|-----|----------------|-----------|---------|-------|-----|----------------|-----------|---------|-------|
| 1   | 5NXV           | 5nxv      | 3.50    | high  | 2   | 8OM            | 5uwk      | 2.30    | high  |
| 3   | C1H            | 3ni5      | 33.47   | high  | 4   | WWV            | 3n3j      | 1.28    | high  |
| 5   | LMS            | 6c7w      | 3410.00 | low   | 6   | 4KB            | 4z1k      | 5.22    | high  |
| 7   | OYQ            | 3oyq      | 10.30   | high  | 8   | MB2            | 4kuw      | 81.00   | high  |
| 9   | 5EN            | 5drr      | 0.00    | high  | 10  | COX            | 2aw1      | 43.00   | high  |
| 11  | EL8            | 6g3o      | 0.58    | high  | 12  | R4C            | 4gr8      | 14.85   | high  |

|    |      |      |            |      |    |      |      |            |      |
|----|------|------|------------|------|----|------|------|------------|------|
| 13 | 2Y6D | 2y6d | 79.00      | high | 14 | NKX  | 3k2f | 63.00      | high |
| 15 | UDB  | 3u7l | 52.40      | high | 16 | GVR  | 2ves | 20.00      | high |
| 17 | FKE  | 6h36 | 0.45       | high | 18 | 2HOC | 2hoc | 0.65       | high |
| 19 | J31  | 4ngp | 10.99      | high | 20 | 1GD  | 4itp | 63.64      | high |
| 21 | 3O1  | 4rfc | 6.13       | high | 22 | 4D9W | 4d9w | 54.00      | high |
| 23 | TI2  | 1qf0 | 42.00      | high | 24 | WZA  | 2x7u | 5340.00    | low  |
| 25 | 2SD  | 3hkt | 4100.00    | low  | 26 | 3A2  | 3aho | 88.90      | high |
| 27 | 99   | 3hyg | 3324.00    | low  | 28 | MFS  | 3hkn | 4594.21    | low  |
| 29 | IN9  | 1usn | 18.00      | high | 30 | OIR  | 1r1j | 2.30       | high |
| 31 | 3OJ  | 3o0j | 65.00      | high | 32 | 915  | 1yqy | 24.00      | high |
| 33 | 9EB  | 5ny6 | 13.50      | high | 34 | SMS  | 1eou | 36.00      | high |
| 35 | CFE  | 3lgg | 0.10       | high | 36 | OLX  | 4dv8 | 0.58       | high |
| 37 | 1ZFQ | 1zfq | 30.00      | high | 38 | KLJ  | 4guy | 10.00      | high |
| 39 | S2O  | 4yyt | 21000.00   | low  | 40 | J96  | 4ngn | 28.10      | high |
| 41 | 9C2  | 5nw7 | 1700.00    | low  | 42 | S8A  | 5clu | 78000.00   | low  |
| 43 | 5DYF | 5dyf | 2300.00    | low  | 44 | 720  | 2jew | 57.41      | high |
| 45 | OEV  | 3d50 | 17000.00   | low  | 46 | AHN  | 2afw | 17000.00   | low  |
| 47 | I38  | 2qdt | 6500.00    | low  | 48 | HQT  | 4q8y | 2300000.00 | low  |
| 49 | O7U  | 3o7u | 52.00      | high | 50 | RTD  | 2m5d | 90.00      | high |
| 51 | LWY  | 3n2c | 7500.00    | low  | 52 | 5MH  | 4q7v | 260000.00  | low  |
| 53 | 6MH  | 4q7w | 2300000.00 | low  | 54 | YHO  | 3dx1 | 265000.00  | low  |

(c)

| No | Ligan<br>d<br>name | PDB<br>ID | Ki (nM)      | Class | No | Ligan<br>d<br>name | PDB<br>ID | Ki<br>(nM)  | Clas<br>s |
|----|--------------------|-----------|--------------|-------|----|--------------------|-----------|-------------|-----------|
| 1  | OK7                | 4dhl      | 33000        | low   | 2  | 4SY                | 4zw6      | 1900        | low       |
| 3  | 61                 | 1a8t      | 1600         | low   | 4  | 4T2                | 4zw8      | 1100        | low       |
| 5  | PC5                | 1p6e      | 1210000      | low   | 6  | JT6                | 2jt6      | 25          | high      |
| 7  | X16                | 4hw<br>p  | 35.1909      | high  | 8  | M3S                | 3fcq      | 170000<br>0 | low       |
| 9  | D66                | 3q43      | 43           | high  | 10 | AGF                | 8cpa      | 0.71        | high      |
| 11 | KIF                | 1ps3      | 5200000      | low   | 12 | EO7                | 6c7x      | 96.5588     | high      |
| 13 | TD3                | 3n9r      | 70           | high  | 14 | ZEB                | 1ctu      | 0.0012      | high      |
| 15 | CCB                | 1u3t      | 1000000<br>0 | low   | 16 | FC4                | 5j8z      | 5           | high      |
| 17 | 24F                | 3elm      | 0.19         | high  | 18 | KLH                | 3rtt      | 7000        | low       |
| 19 | 1B3                | 4hws      | 0.979796     | high  | 20 | ZAF                | 6cpa      | 0.003       | high      |
| 21 | FOT                | 2eg8      | 31800        | low   | 22 | PIU                | 1ze8      | 21          | high      |
| 23 | TM7                | 4mlx      | 650000       | low   | 24 | FXY                | 1u3<br>w  | 40000       | low       |
| 25 | 4WA                | 5byi      | 30.7         | high  | 26 | FMS                | 1bcd      | 2           | high      |
| 27 | 51J                | 5aml      | 0.7          | high  | 28 | TH0                | 2osf      | 148000      | low       |
| 29 | HPR                | 2ada      | 0.0001       | high  | 30 | RS2                | 966c      | 23          | high      |

|    |     |          |      |      |    |      |      |       |      |
|----|-----|----------|------|------|----|------|------|-------|------|
| 31 | 56W | 5d2r     | 1500 | low  | 32 | PN3  | 5jf8 | 1428  | low  |
| 33 | SXS | 4cq0     | 8106 | low  | 34 | 4RUZ | 4ruz | 23.1  | high |
| 35 | IT5 | 3p5l     | 40.8 | high | 36 | 4FH  | 4q87 | 14000 | low  |
| 37 | LHY | 1hee     | 4600 | low  | 38 | BIR  | 1r1h | 1.2   | high |
| 39 | 5WM | 5fdi     | 18.5 | high | 40 | UHF  | 3u7n | 11.2  | high |
| 41 | 45I | 5am<br>d | 2.8  | high | 42 | TQI  | 2y6c | 10000 | low  |
| 43 | GOO | 3dx4     | 76   | high |    |      |      |       |      |

**Table S5.** Information on the 34 descriptors used in **Model 5**.

| Descriptor names | description                                                                             | Classes                               |
|------------------|-----------------------------------------------------------------------------------------|---------------------------------------|
| ESP_balance      |                                                                                         |                                       |
| parameter_Progg  | Electrostatic potential energy                                                          | Electrical                            |
| en_VAMP          |                                                                                         |                                       |
| BCUT_PEOE_3      | Local distribution of charge values in PEOE                                             | Adjacency and Distance Matrix         |
| petitjean        | Value of (diameter - radius) / diameter.                                                | Descriptors                           |
| nBr              | Number of bromine atoms                                                                 | Atom Count                            |
| nN               | Number of nitrogen atoms                                                                | Descriptor                            |
| AATS7s           | Average Broto-Moreau autocorrelation - lag 7 / weighted by I-state                      | Autocorrelation descriptors           |
| AATS8s           | Average Broto-Moreau autocorrelation - lag 8 / weighted by I-state                      |                                       |
| ATSC1s           | Centered Broto-Moreau autocorrelation - lag 1 / weighted by I-state                     |                                       |
| GATS5e           | Geary autocorrelation - lag 5 / weighted by Sanderson electronegativities               |                                       |
| VE1_Dzs          | Coefficient sum of the last eigenvector from Barysz matrix / weighted by I-state        | Barysz Matrix Descriptor              |
| BCUTp-1h         | nlow highest polarizability weighted BCUTS                                              | BCUT Descriptor                       |
| SpMax2_Bhm       | Largest absolute eigenvalue of Burden modified matrix - n 2 / weighted by relative mass | Burden modified eigenvalue descriptor |
| ES_Count_ssNH    | Calculate the E-state count for atom                                                    | Estate Keys                           |



|              |                                                                                                                                                                                                |                                                  |
|--------------|------------------------------------------------------------------------------------------------------------------------------------------------------------------------------------------------|--------------------------------------------------|
| type NH.     |                                                                                                                                                                                                |                                                  |
| IC1          | Information content index<br>(neighborhood symmetry of 1-order)                                                                                                                                | Information<br>Content<br>Descriptor             |
| MIC5         | Modified information content index<br>(neighborhood symmetry of 5-order)                                                                                                                       |                                                  |
| nAtomP       | Number of atoms in the largest pi<br>system                                                                                                                                                    | Largest Pi System<br>Descriptor                  |
| HBA_Count    | The number of hydrogen bond<br>accepting groups in the molecule.                                                                                                                               | Molecular<br>Property Counts                     |
| PEOE_VSA-0   | Sum of vi where qi is in the range<br>[-0.05,0.00).                                                                                                                                            | Local charge<br>descriptors                      |
| PEOE_VSA+1   | Sum of vi where qi is in the range<br>[0.05,0.10).                                                                                                                                             |                                                  |
| PEOE_VSA-4   | Sum of vi where qi is in the range<br>[-0.25,-0.20).                                                                                                                                           |                                                  |
| vsa_acc      | Approximation to the sum of VDW<br>surface areas (Å <sup>2</sup> ) of pure hydrogen<br>bond acceptors (not counting atoms<br>that are both hydrogen bond donors<br>and acceptors such as -OH). | Pharmacophore<br>Feature<br>Descriptors          |
| SlogP_VSA3   | Sum of vi such that Li is in (0,0.1].                                                                                                                                                          | Subdivided<br>Surface Areas                      |
| SlogP_VSA1   | Sum of vi such that Li is in (-0.4,-0.2].                                                                                                                                                      |                                                  |
| SMR_VSA4     | Sum of vi such that Ri is in (0.39,0.44].                                                                                                                                                      |                                                  |
| npr1         | Normalized PMI ratio pmi1/pmi3.                                                                                                                                                                |                                                  |
| vsurf_EDmin3 | Lowest hydrophobic energy                                                                                                                                                                      |                                                  |
| pmiX         | x component of the principal moment<br>of inertia (external coordinates).                                                                                                                      | Surface Area,<br>Volume and<br>Shape Descriptors |
| pmiY         | y component of the principal moment                                                                                                                                                            |                                                  |

|       |                                                                                       |                       |
|-------|---------------------------------------------------------------------------------------|-----------------------|
|       | of inertia (external coordinates).                                                    |                       |
| pmiZ  | z component of the principal moment<br>of inertia (external coordinates).             |                       |
| JGI2  | Mean topological charge index of order<br>2                                           |                       |
| JGI6  | Mean topological charge index of order<br>6                                           |                       |
| JGI8  | Mean topological charge index of order<br>8                                           | Topological           |
| JGI9  | Mean topological charge index of order<br>9                                           | charge<br>descriptors |
| VR2_D | Normalized Randic-like<br>eigenvector-based index from<br>topological distance matrix |                       |

**Table S6.** The interpretation and distribution of the eight important electronical-related descriptors in **Model 5**.

| Descriptor<br>names | $\mu(\mu-1.96\sigma, \mu+1.96\sigma)$ |                            | Correlation | P value | Classes                                         | Interpretation                                                                     |
|---------------------|---------------------------------------|----------------------------|-------------|---------|-------------------------------------------------|------------------------------------------------------------------------------------|
|                     | high activity                         | low activity               |             |         |                                                 |                                                                                    |
| JGI9                | 0.009<br>(-0.003,0.021)               | 0.004<br>(-0.006,0.014)    | 0.44        | 0       | Adjacency and<br>Distance Matrix<br>Descriptors | Average Broto-Moreau autocorrelation - lag 8 /<br>weighted by I-state              |
| JGI8                | 0.011<br>(0.001,0.021)                | 0.006<br>(-0.01,0.022)     | 0.36        | 0       |                                                 | Local distribution of charge values in PEOE                                        |
| HBA_Count           | 3.637<br>(0.178,7.096)                | 2.061<br>(-2.763,6.885)    | 0.35        | 0       | Molecular<br>Property Counts                    | Normalized Randic-like eigenvector-based index<br>from topological distance matrix |
| PEOE_VSA-4          | 22.841<br>(-11.155,56.837)            | 11.374<br>(-13.565,36.313) | 0.34        | 0       | Local charge<br>descriptors                     | Mean topological charge index of order 6                                           |
| PEOE_VSA+1          | 57.195<br>(1.004,113.386)             | 38.923<br>(-11.261,89.107) | 0.31        | 0       |                                                 | Geary autocorrelation - lag 5 / weighted by<br>Sanderson electronegativities       |
| PEOE_VSA-0          | 46.382<br>(-15.378,108.142)           | 29.62<br>(-18.892,78.132)  | 0.30        | 0       |                                                 | Mean topological charge index of order 9                                           |
| nAtomP              | 11.311<br>(1.143,21.479)              | 7.316<br>(-0.206,14.838)   | 0.40        | 0       | Largest Pi<br>System                            | Average Broto-Moreau autocorrelation - lag 7 /<br>weighted by I-state              |

| Descriptor                                                             |                         |                          |      |   |                    |
|------------------------------------------------------------------------|-------------------------|--------------------------|------|---|--------------------|
| BCUTp-1h                                                               | 10.941<br>(8.45,13.432) | 10.026<br>(7.355,12.697) | 0.35 | 0 | BCUT<br>Descriptor |
| Centered Broto-Moreau autocorrelation - lag 1 /<br>weighted by I-state |                         |                          |      |   |                    |

**Table S7.** The structure and activity of 10 compounds obtained by virtual screening for HDAC1.

| Compd.<br>No. | Structure                                                                           | Inhibition<br>Rate (%) | Compd.<br>No. | Structure                                                                             | Inhibition<br>Rate <sup>#</sup> (%) |
|---------------|-------------------------------------------------------------------------------------|------------------------|---------------|---------------------------------------------------------------------------------------|-------------------------------------|
| 1             | 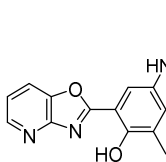   | 3.5<br>± 2.3           | 6             |    | 17.8<br>± 3.0                       |
| 2             |    | 4.7<br>± 0.2           | 7             |    | 4.1<br>± 1.8                        |
| 3             |  | 16.2<br>± 5.5          | 8             |  | 23.3<br>± 1.8                       |
| 4             |  | 3.4<br>± 3.8           | 9             |  | <b>99.4</b><br>± 0.0                |
| 5             |  | 1.1<br>± 7.4           | 10            |  | 6.2<br>± 0.2                        |

<sup>#</sup> The percentage inhibition was calculated from two measures under the concentration of 100  $\mu$ M.
